# Supplementary material for: Evaluating harm associated with anti-malarial drugs: a survey of methods used by clinical researchers to elicit, assess and record participant-reported adverse events and related data
Source: PubMed Central journal article supplement (PMC3848530; doi:10.1186/1475-2875-12-325), 2013-09-16
Supplement: 1475-2875-12-325-S1.pdf [file 1475-2875-12-325-S1.pdf]

**Survey questionnaire****Welcome****Elicitation and Recording of Participant-reported Safety Data in Malaria Clinical Drug Trials/Studies**

We are interested in talking to malaria clinical research team members about the details of how malaria clinical research participants (or their caregivers, such as a parent) are asked about their health and treatment-taking in order to collect medical history, adverse event and concomitant medication (safety) data. The survey is not about spontaneous reporting of adverse drug reactions (yellow-card, prescription event monitoring etc.) or vaccine clinical research.

This voluntary survey should take about 15-20 minutes. We would like to be able to follow up with you about specific methods you have used and have the opportunity to work with you in future collaborations. We would therefore be grateful if you would provide your name and contact details. These will be stored in secure electronic and paper files and will not be used in any report.

Should other members of your research team have used the same methods to collect safety data then one person may respond on behalf of the team. Ideally, this should be a clinical investigator or someone who has been involved in the selection or development of methods used to collect participant-reported safety data.

1) In which country do you work *most of the time*? ( ) Abkhazia to ( ) Zimbabwe

2) Your name: \_\_\_\_\_

3) What is the name of the organization where you work? \_\_\_\_\_

4) Phone number (please include country and area codes!): \_\_\_\_\_

5) Email address: \_\_\_\_\_

6) How long have you been involved in *malaria* clinical research?\*

( ) Have never been involved in malaria clinical research

( ) < 1 year

( ) 1-5 years

( ) > 5 years

7) Indicate your *most recent primary role* within malaria clinical research? Check the one that fits your role best.\*

( ) Working at an investigational site

( ) Representative of a sponsor (other than sponsor-investigator)

( ) Other: \_\_\_\_\_

Indicate your *most recent primary role* at an investigational site?

( ) Principal investigator

( ) Co-investigator or sub-investigator

( ) Study coordinator

- Research nurse
- Research team member other (briefly describe role): \_\_\_\_\_
- Other: \_\_\_\_\_

**8) Is the majority of your malaria clinical research sponsored by:**

- Pharmaceutical companies
- Non-commercial entities (e.g. Medicines for Malaria Venture)
- Your own institution (i.e. a member of the team is a Sponsor-investigator)
- Other: \_\_\_\_\_

**9) Have you had responsibility for *selecting or developing* methods used to collect adverse event or concomitant medication data in clinical trials/studies?**

- Yes
- No

Please consider your *most recent malaria* clinical drug research study where participants (or their caregiver, such as a parent) were asked about their health and use of treatments to collect medical history, adverse event or concomitant medication data.

**10) What type of study was your *most recent malaria* clinical research study? Check all that apply:**

- Interventional
- Observational
- Single arm
- Multiple arms
- Randomized allocation
- Other

**11) What was the research population of your *most recent malaria* clinical research study? Check all that apply:**

- Adults
- Children <1year
- Children 1-5 years
- Children 5-12 years
- Children 12-17 years
- Healthy volunteers
- Patients with malaria
- Other

**In general, from about what age were children asked directly about their *health*?**

- Age in years: \_\_\_\_\_
- Children were NOT asked directly at all
- Don't know

**In general, from about what age were children asked directly about their *use of treatments*?**

- Age in years: \_\_\_\_\_
- Children were NOT asked directly at all
- Don't know

**12) Which staff members were involved in asking participants (or their caregivers) about their health and use of treatments? Check all that apply:**

- Medical doctor
- Study nurse
- Other

**13) Were questions about health and use of treatments ever asked through a translator?**

- Yes
- No
- Don't know

**Asking participants (or their caregivers) about *health* to collect adverse event (AE) data, at visits *after* the first visit.**

**14) Were participants (or their caregiver) asked about their *health* since baseline using a general question *without* reference to a particular condition or body system, e.g. 'how have you been feeling?' or 'has your child experienced any problems?'**

- Yes
- No
- Don't know

**Please give the phrase(s) or question(s) used:**

- Don't know
- Phrase(s) used: \_\_\_\_\_

**Did the study *require* this particular phrase(s) be used for the general question(s)?**

- Yes
- No
- Don't know

**How confident are you that all staff used the study-specific phrase(s) *most* of the time?**

- Confident
- Not confident

**Asking participants (or their caregivers) about their *health* to collect adverse event (AE) data, at visits *after* the first visit (continued).**

**15) Were participants (or their caregiver) asked about any *change in their health* since baseline using *structured* questions, e.g. 'please tell me if you have experienced fever, cough, headache....?' or 'has your child had any problems with the chest, head....?'**

- Yes  
 No  
 Don't know

**Did the study *require particular* questions be asked, e.g. using a prepared list of possible options?**

- Yes  
 No  
 Don't know

**How were health issues defined in the questions? Check all that apply:**

- By symptom  
 By body system  
 Expected adverse events  
 Malaria symptoms  
 Other

**How were options presented? Check all that apply:**

- Staff used the exact words as prepared  
 Staff rephrased items in their own words  
 Items were only presented if they had been reported at a previous visit  
 Other

**Please *describe* any non study-specific *structured* questions asked:**

- Question(s) used: \_\_\_\_\_  
 Don't know

**16) Were participants (or their caregiver) asked about their *health* since baseline in *another way* to the general or structured method (e.g. picture tool, diary)?**

- Yes  
 No  
 Don't know

**Please briefly describe the method(s): \_\_\_\_\_**

**17) What was the rationale for using the above whole approach to questioning about *health* in this study?**

**18) Was this *same* approach to questioning participants (or their caregivers) about their *health* to collect AEs, also used when asking about medical history at *baseline*?**

- Yes
- No
- Don't know

**19) How was the questioning about health *different* at baseline? \_\_\_\_\_**

**20) Does the above approach to questioning participants (or their caregivers) about their *health* reflect *most malaria clinical studies* you have been involved in?**

- Yes
- No
- Don't know
- Other: \_\_\_\_\_

**Please briefly describe other questioning methods or combinations of methods used: \_\_\_\_\_**

**21) What do you consider as an *optimal* (important and feasible) approach for asking participants (or their caregivers) about their *health* to collect AE data:**

- The approach reported above
- A different approach to my above report (briefly describe): \_\_\_\_\_

**22) Why do you consider that optimal?**

**Recording of adverse events (AEs) in the database.**

**23) How were the participants' (or their caregivers') reports eventually *recorded in the database* as AEs? Check all that apply:**

- As verbatim participant (or caregiver) reports
- According to staff members' own terminology for symptom or diagnosis
- Standard terminology (e.g. specific coding method)
- Other

**Which standard terminology or coding system was used? \_\_\_\_\_**

**24) How did you assess AEs for *severity*, if at all?**

- Not assessed for severity
- Published grading scale
- Other grading scale method
- Don't know

**Please provide us with a reference to the grading scale or a description of the method used, if known:**

**25) How did you assess adverse events for *causality*, if at all?**

- Not assessed for causality

- Published causality rating
- Other causality rating method
- Don't know

Please provide us with a reference to the rating scale or a description of the method used, if known:

**Asking participants (or their caregivers) about their *use of treatments* (other than the study drug) to record previous and concomitant medication data.**

**26) Were participants (or their caregiver) questioned about their *use of non-study treatments* using a general question *without* reference to a particular treatment class or name, e.g. 'Please tell me about any treatment you have used' or 'Please tell me about any treatment your child is currently using'?**

- Yes
- No
- Don't know

Please give the phrase(s) or question(s) used:

- Don't know
- Phrase(s) used: \_\_\_\_\_

**Did the study *require* this particular phrase(s) be used for the general question(s)?**

- Yes
- No
- Don't know

**Which of the following were explicitly referred to during general questioning (check all that apply):**

- Prescription medicines
- Over the counter medicines
- Traditional treatments
- Supplements
- Vaccinations
- Other

**27) Were participants (or their caregiver) questioned about their *use of non-study treatments* by asking *specific* or *structured* questions, e.g. 'Have you taken paracetamol, antibiotics....?'**

- Yes
- No
- Don't know

**Did the study *require particular questions* be asked, e.g. using a prepared list of possible options?**

- Yes
- No

Don't know

**How were non-study treatments defined in these questions? Check all that apply:**

Don't know

By treatment class (e.g. painkillers)

By treatment name (e.g. paracetamol)

Other

**Which of the following were explicitly asked about during *structured* questioning? Check all that apply:**

Prescription medicines

Over the counter medicines

Traditional treatments

Supplements

Vaccinations

Other

**How were options presented? Check all that apply:**

Staff used the exact words as prepared

Staff re-phrased items in their own words

Items were only presented if they had been reported at a previous visit

Other

**Please describe any non study-specific questions asked:**

Don't know

Question(s) used: \_\_\_\_\_

**28) Were participants (or their caregiver) questioned about their *use of non-study treatments in another way to the general or structured method, e.g. picture tool, diary?***

Yes

No

Don't know

**Please briefly describe the method(s):**

**29) What was the rationale for using the above whole approach for questioning about *use of non-study treatments* in this study?**

**30) Does the above approach to questioning participants (or their caregivers) about their *use of non-study treatments* reflect normal practice in *most* malaria clinical studies you have been involved in?**

Yes

No

Other: \_\_\_\_\_

Please briefly describe other questioning methods or combinations of methods used:

**31) What do you consider as an *optimal* (important and feasible) approach for asking participants (or caregivers) about their *use of non-study treatments* to collect previous and concomitant medication data:**

The approach reported above

A different approach to my above report (briefly describe): \_\_\_\_\_

**32) Why do you consider that optimal?**

Please consider your *most recent malaria* clinical research study where participants (or their caregiver, such as a parent) were asked about adherence to treatment(s) given during the study, when answering the questions on this page.

**33) What was the study drug regimen?**

**34) Did you collect individual participant data on drug intake?**

Yes

No

Don't know

**35) What was the reason for not collecting such data?**

Don't know

Reason(s): \_\_\_\_\_

**36) How did you collect the data? Check all that apply:**

Dose observed

Participant (or caregiver) recall

Pill count (manual/electronic)

Dispensing confirmation

Pill diary

Other

**Were all drug doses observed?**

All doses observed

Some doses observed

Don't know

**37) Which data did you record? Check all that apply:**

Quantity of dose dispensed

Dose given

Duration of total therapy

Time of dose



- Whether participant vomited
- Reason(s) for non-adherence
- Whether taken with food/drink
- Other

**Was time of dose recorded for all drug doses?**

- Time was recorded for all doses
- Time was recorded for some doses
- Don't know

**When it was recorded that a participant vomited, what action was taken and how was this recorded?**

**38) How did you define adherence levels in your study?**

**39) Did you report adherence in the trial report?**

- Yes
- No
- Don't know

**General**

**41) We would appreciate if you would suggest any *references* that you know to be relevant for this work. Please describe any references you may know of here:**

**42) Would you like to hear about future projects for this topic?**

- Yes

**Thank you for taking the time to complete this survey, we appreciate your input into this complex topic.**
